# Supplementary material for: Evaluation of Vertebrate-Specific Replication-Defective Zika Virus, a Novel Single-Cycle Arbovirus Vaccine, in a Mouse Model
Source: MDPI journal article supplement (doi:10.3390/vaccines9040338), 2021-04-01
Supplement: s1 [file s1]

# The cytokine responses in the pregnant mouse brain

Five-week-old female AG129 mice were immunized with  $1 \times 10^6$  FFU VSRD-ZIKV, or DMEM through the s.c. route. On day 14 post-immunization (p.i.) the  $1 \times 10^6$  FFU VSRD-ZIKV group was immunized with  $1 \times 10^6$  FFU VSRD-ZIKV again. The female AG129 mice received a prime-boost regimen of VSRD-ZIKV were mated on day 22 post-infection. The pregnant mice were then challenged with a lethal ZIKV infection (PRAVABC59 strain) and the placenta, fetal brain, and pregnant mouse brain were assessed 12 days post-infection for cytokine expression and histopathology (Figure, 4). Total RNA of cells was extracted by Trizol reagent (Invitrogen), and 1  $\mu$ g of RNA was used to synthesize cDNA using a first strand cDNA synthesis kit of SuperScript III System (ThermoFisher Scientific, Waltham, MA). Quantitative real-time RT-PCR was performed using a 7500 real-time PCR system (Applied Biosystems) and SYBR green PCR master mix (Toyobo, Osaka, Japan). Data were normalized to the level of  $\beta$ -actin expression in each sample. Primers used are listed in Table S1. The relative expression of TNF- $\alpha$ , CCL-5, IL-1 $\beta$ , and IL-6 were normalized to the levels of endogenous control  $\beta$ -actin within each sample using the  $2^{-\Delta\Delta CT}$  (where CT is threshold cycle) method.

**Table S1.** Primer pairs used for quantitative real-time RTPCR analyses.

| Primer name      | Sequence (5'-3')        |
|------------------|-------------------------|
| $\beta$ -actin-F | CACTGCCGCATCCTCTTCCTCCC |
| $\beta$ -actin-R | CAATAGTGATGACCTGGCCGT   |
| TNF-a-F          | TGTCTCAGCCTCTTCTCATTCC  |
| TNF-a-R          | TTAGCCCACTTCTTCCCTCAC   |
| CCL-5-F          | TGCCACGTCAAGGAGTATTTC   |
| CCL-5-R          | AACCCACTTCTTCTGGGTTG    |
| IL-6-F           | CTGCTTCTGGTGATGGCTACTG  |
| IL-6-R           | GGCATCACCTTTGGCATCTT    |
| IL-1 $\beta$ -F  | AACCTGCTGGTGTGTGACGTTC  |
| IL-1 $\beta$ -R  | CAGCACGAGGCTTTTTTGTGT   |

Notes: F for forward primers, R for reverse primers.

Figure S1. The cytokine responses in the pregnant mouse brain.

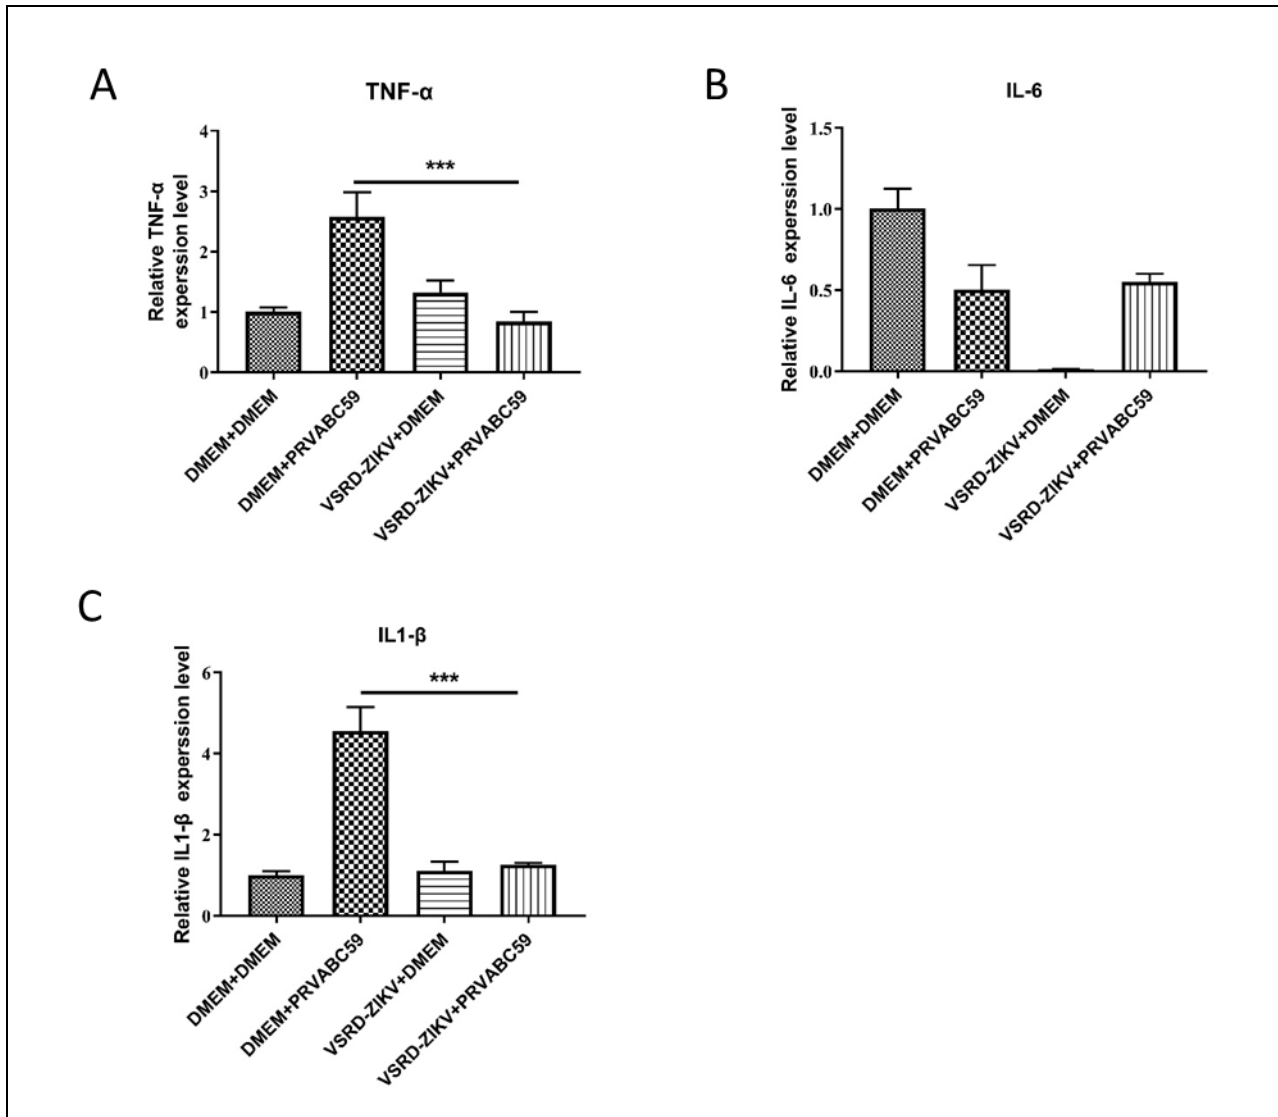

Figure, S1. The cytokine responses in the pregnant mouse brain. Five-week-old female AG129 mice ( $n = 9$ ) were immunized with  $1 \times 10^6$  FFU VSRD-ZIKV, or DMEM through the s.c. route. On day 14 p.i. the  $1 \times 10^6$  FFU VSRD-ZIKV group were immunized with  $1 \times 10^6$  FFU VSRD-ZIKV again. On day 22 p.i. immunized AG129 female mice were mated with naïve male AG129 mice. At E6, mice were inoculated subcutaneously with  $10^3$  FFU of ZIKV PRVABC59 via intraperitoneal injection. All animals were sacrificed on E18 and the cytokine responses in the pregnant mouse brain were assessed by qRT-PCR: (A) TNF- $\alpha$ ; (B) IL-6; and (c) IL1- $\beta$ . Data are expressed as means  $\pm$  SEM from three independent experiments. \*\*\* $P < 0.001$ .
